# Supplementary material for: Four POM-based complexes modified by multi-nuclear clusters: structure, photocatalytic, supercapacitor and chromogenic properties
Source: Royal Society of Chemistry journal article supplement (doi:10.1039/d2ce00255h), 2022-01-01
Supplement: d2ce00255h1.pdf [file d2ce00255h1.pdf]

# Four POM-based complexes modified by multi-nuclear clusters: structures, photocatalytic, supercapacitor and chromogenic properties

Shufang Ma, Jun Ying,\* Yanping Zhang, Aixiang Tian\*

Table S1. Selected bond distances (Å) and angles (°) for complexes 1–4.

| Complex 1                      |            |                                |           |
|--------------------------------|------------|--------------------------------|-----------|
| Cu(1)-N(5)                     | 2.157(2)   | Cu(2)-N(4)                     | 1.993(2)  |
| Cu(1)-N(1)                     | 1.961(2)   | Cu(2)-N(2) <sup>2</sup>        | 2.026(2)  |
| Cu(1)-O(14)                    | 1.9342(18) | Cu(1)-O(11)                    | 2.052(2)  |
| O(14)-Cu(1)-O(14) <sup>2</sup> | 82.53(8)   | O(14)-Cu(1)-O(11)              | 99.21(8)  |
| O(14)-Cu(1)-N(5)               | 85.86(8)   | O(14)-Cu(1)-N(1)               | 167.77(9) |
| O(11)-Cu(1)-N(5)               | 91.52(9)   | N(1)-Cu(1)-O(11)               | 89.41(9)  |
| N(1)-Cu(1)-N(5)                | 102.68(9)  | O(14)-Cu(2)-Cl(1)              | 170.68(6) |
| O(14)-Cu(2)-N(4)               | 89.84(9)   | N(4)-Cu(2)-Cl(1)               | 95.04(7)  |
| N(4)-Cu(2)-N(2) <sup>2</sup>   | 150.73(10) | N(2) <sup>2</sup> -Cu(2)-Cl(1) | 93.49(7)  |

Symmetry codes for 1: <sup>1</sup>1-X, -Y, 1-Z; <sup>2</sup>2-X, 1-Y, 1-Z

  

| Complex 2        |           |                  |           |
|------------------|-----------|------------------|-----------|
| Cu(1)-O(1W)      | 1.971(9)  | Cu(1)-N(1)       | 1.997(10) |
| Cu(1)-O(3W)      | 1.978(14) | Cu(1)-N(5)       | 1.949(11) |
| Cu(1)-O(2W)      | 2.332(13) | N(5)-Cu(1)-N(1)  | 166.8(5)  |
| N(5)-Cu(1)-O(1W) | 90.5(5)   | O(1W)-Cu(1)-N(1) | 94.5(5)   |
| N(5)-Cu(1)-O(2W) | 100.1(5)  | O(3W)-Cu(1)-N(1) | 83.6(5)   |

  

| Complex 3        |          |                               |          |
|------------------|----------|-------------------------------|----------|
| Cu(1)-N(5)       | 2.027(6) | Cu(2)-N(6)                    | 1.984(6) |
| Cu(1)-N(3)       | 2.052(7) | Cu(2)-N(6) <sup>1</sup>       | 1.984(6) |
| Cu(1)-N(9)       | 1.960(8) | Cu(2)-N(4)1                   | 1.975(6) |
| N(5)-Cu(1)-Cl(1) | 86.2(2)  | N(6) <sup>1</sup> -Cu(2)-N(6) | 180.0(3) |

|                  |          |                               |           |
|------------------|----------|-------------------------------|-----------|
| N(5)-Cu(1)-N(3)  | 90.8(3)  | N(4)-Cu(2)-N(6) <sup>1</sup>  | 90.5(3)   |
| N(3)-Cu(1)-Cl(1) | 174.4(2) | N(4)-Cu(2)-N(6) <sup>1</sup>  | 89.5(3)   |
| N(9)-Cu(1)-Cl(1) | 88.7(3)  | N(4) <sup>1</sup> -Cu(2)-N(6) | 90.5(3)   |
| N(9)-Cu(1)-N(5)  | 174.6(3) | N(4)-Cu(2)-N(6)               | 89.5(3)   |
| N(9)-Cu(1)-N(3)  | 94.5(3)  | N(4)-Cu(2)-N(4) <sup>1</sup>  | 180.00(3) |

Symmetry codes for **3**: <sup>1</sup>1-X, 1-Y, 1-Z

#### Complex **4**

|                               |            |                              |          |
|-------------------------------|------------|------------------------------|----------|
| Co(1)-N(9)                    | 2.078(5)   | Co(1)-N(1)                   | 2.076(5) |
| Co(1)-N(6)                    | 2.142(5)   | Co(1)-O(22)                  | 2.125(4) |
| Co(1)-N(9)                    | 2.078(5)   | Co(1)- O(21) <sup>3</sup>    | 2.038(5) |
| Co(2)-N(2) <sup>4</sup>       | 2.166(5)   | Co(2)-N(2)                   | 2.166(5) |
| Co(2)-N(10)                   | 2.125(5)   | Co(2)-N(5)                   | 2.172(5) |
| N(9)-Co(1)-O(22)              | 175.98(19) | N(9)-Co(1)-N(6)              | 87.7(2)  |
| N(1)-Co(1)-N(9)               | 95.2(2)    | N(1)-Co(1)-N(6)              | 90.4(2)  |
| N(2)-Co(2)-N(5)               | 88.9(2)    | N(2)-Co(2)-N(5) <sup>4</sup> | 91.1(2)  |
| N(10)-Co(2)-N(2) <sup>4</sup> | 88.5(2)    | N(10)-Co(2)-N(5)             | 86.7(2)  |

Symmetry codes for **4**: <sup>1</sup>2-X, 1-Y, 2-Z; <sup>2</sup>1-X, -Y, 1-Z; <sup>3</sup>1-X, 1-Y, 1-Z; <sup>4</sup>1-X, 1-Y, 1-Z

## Ligand syntheses

**Synthesis of Tpm:** Formaldehyde hydrazide (6 g) was dissolved in 200 ml methanol, triethyl orthoformate (33 ml) was added and refluxed at 75 °C for 2 hours. Then N-(3-aminopropyl)-morpholine (7.3 ml) was added and refluxed for 4 hours.

**Synthesis of Cmt:** Triazole (1.4 g) was dissolved in 35 ml ethanol, and 0.47 g of Na wire was added. When the sodium wire was completely dissolved, 2 ml of chloromethylcyclopropane was added. The solution was stirred well, and refluxed for three days at 78 °C.

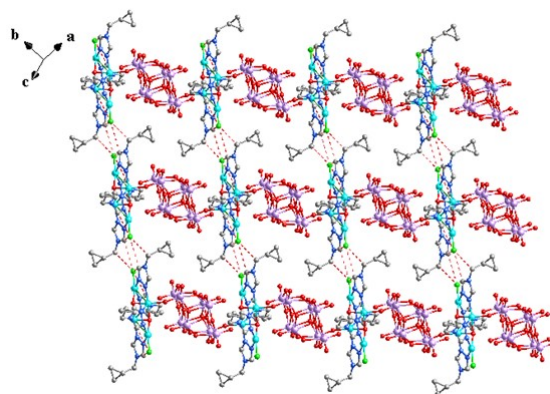

**Fig. S1.** The 2D supramolecular layer of complex 1.

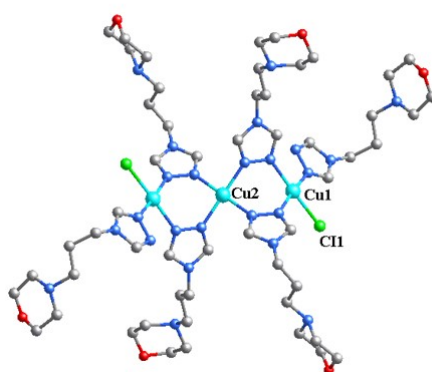

**Fig. S2.** The tri-nuclear Cu cluster constructed by four B-type and two A-type Tpm ligands of complex 3.

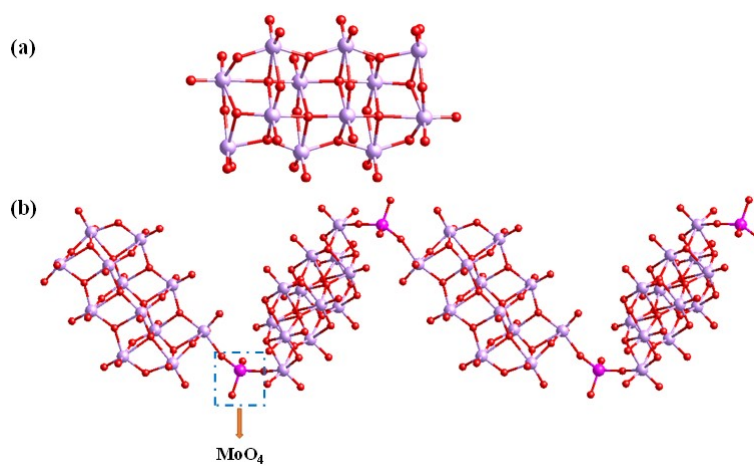

**Fig. S3.** (a) The  $\{Mo_{12}O_{40}\}$  subunits in complex 4. (b) The 1D inorganic chain with  $\{Mo_{12}O_{40}\}$  connected by  $\{MoO_4\}$  subunits through sharing the same O atoms.

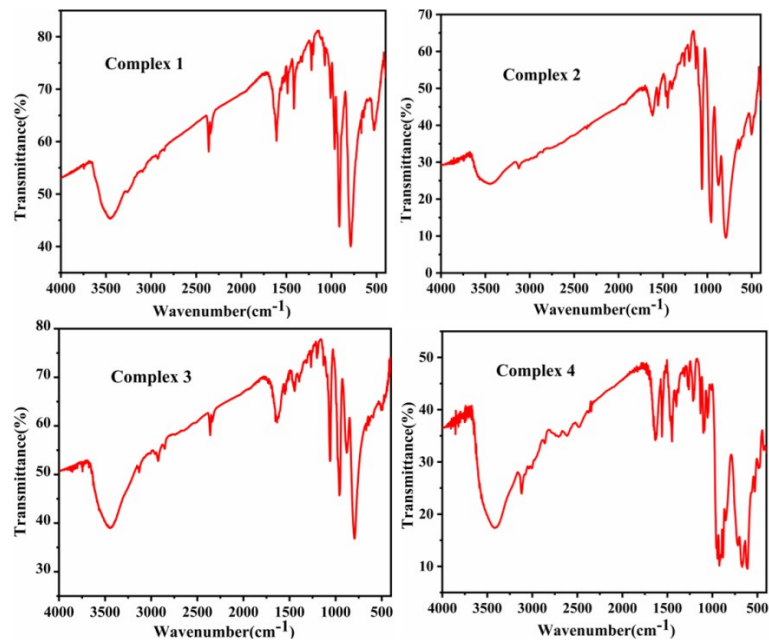

**Fig. S4.** The IR spectra of complexes 1–4.

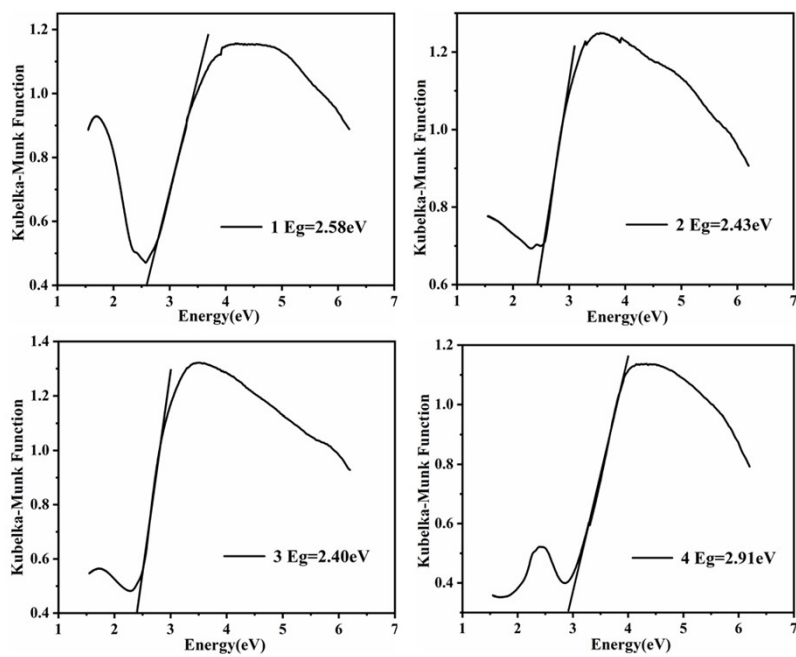

**Fig. S5.** Solid-state optical diffuse-reflection spectra of complexes 1–4 derived from diffuse reflectance data at room temperature.

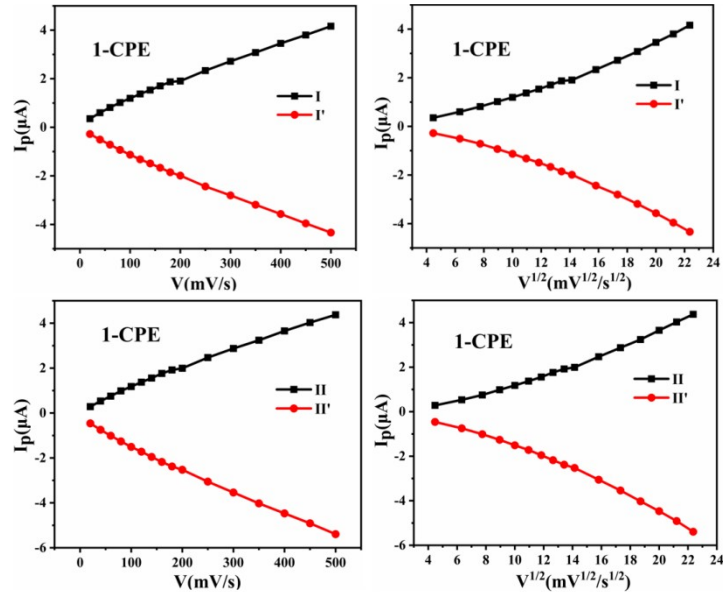

Fig. S6. The dependence of anodic peak and cathodic peak currents of 1-CPE on  $v$  and  $v^{1/2}$ .

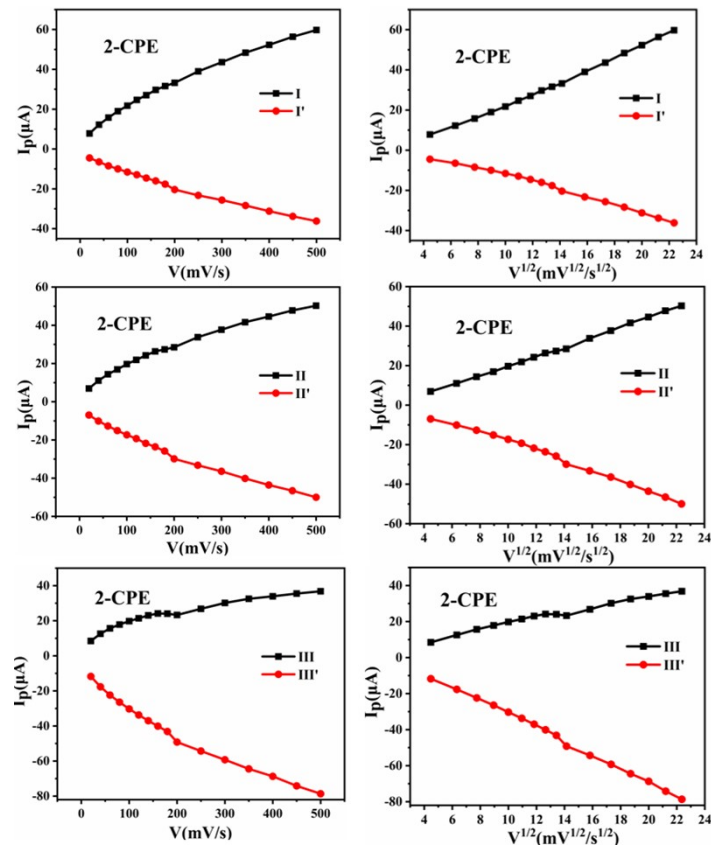

Fig. S7. The dependence of anodic peak and cathodic peak currents of 2-CPE on  $v$  and  $v^{1/2}$ .

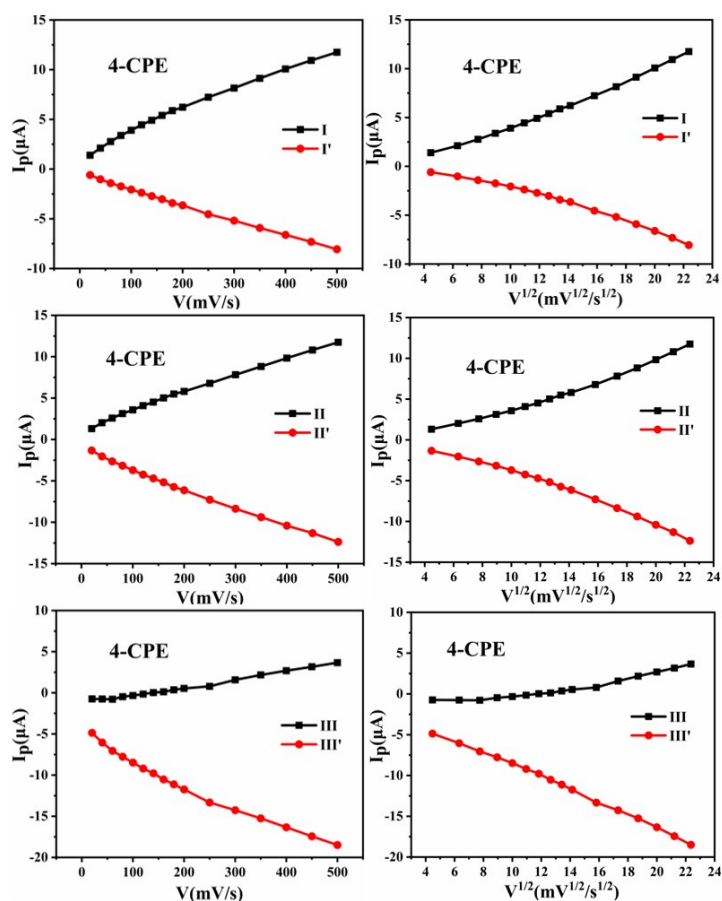

Fig. S8. The dependence of anodic peak and cathodic peak currents of 4-CPE on  $v$  and  $v^{1/2}$ .

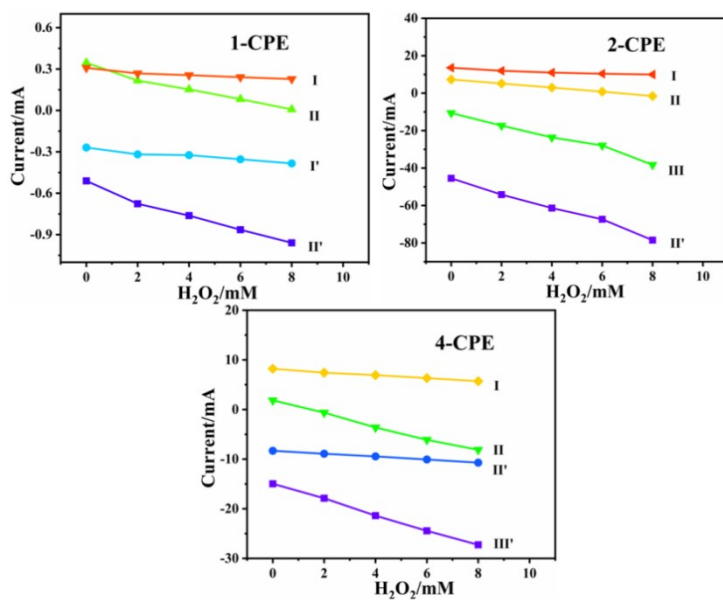

Fig. S9. Dependence of anodic and cathodic peak currents on  $\text{H}_2\text{O}_2$  concentration for n-CPEs ( $n=1, 2$  and  $4$ ).

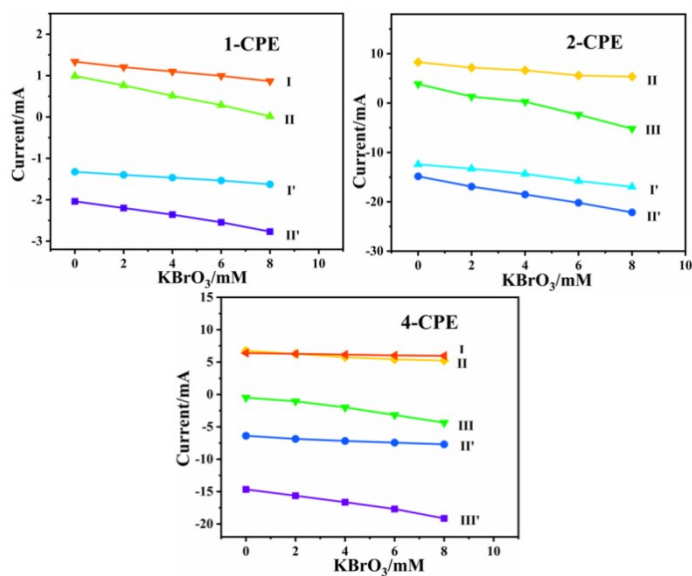

**Fig. S10.** Dependence of anodic and cathodic peak currents on KBrO<sub>3</sub> concentration for n-CPEs (n=1, 2 and 4).

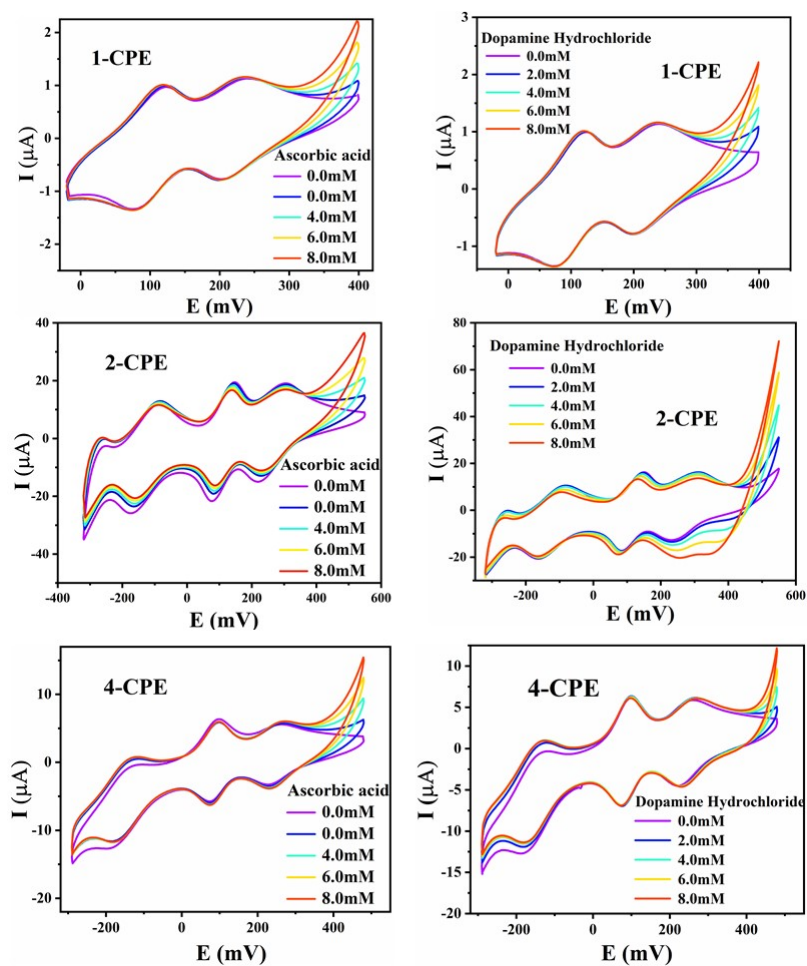

**Fig. S11.** Cyclic voltammograms of 1-, 2- and 4-CPEs in 0.1 M H<sub>2</sub>SO<sub>4</sub> + 0.5 M Na<sub>2</sub>SO<sub>4</sub> aqueous solution containing 0–8 mM AA and DP. Scan rate: 200 mV·s<sup>-1</sup>.

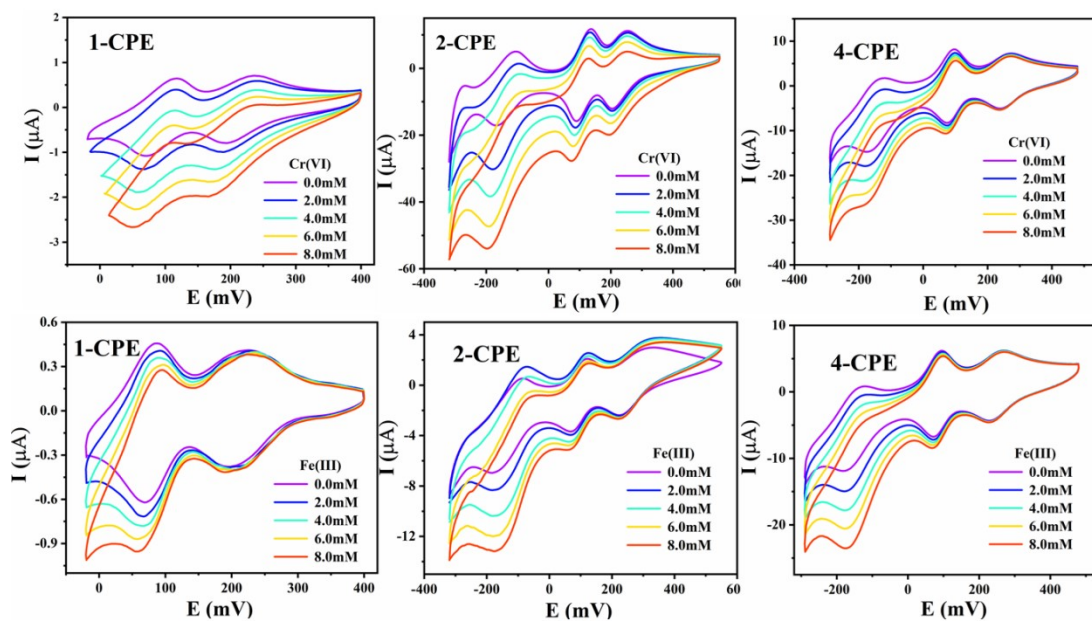

**Fig. S12.** Cyclic voltammograms of the 1-, 2- and 4-CPEs in 0.1 M  $\text{H}_2\text{SO}_4$  + 0.5 M  $\text{Na}_2\text{SO}_4$  aqueous solution containing 0–8 mM Cr(VI) and Fe(III). Scan rate:  $200 \text{ mV} \cdot \text{s}^{-1}$ .

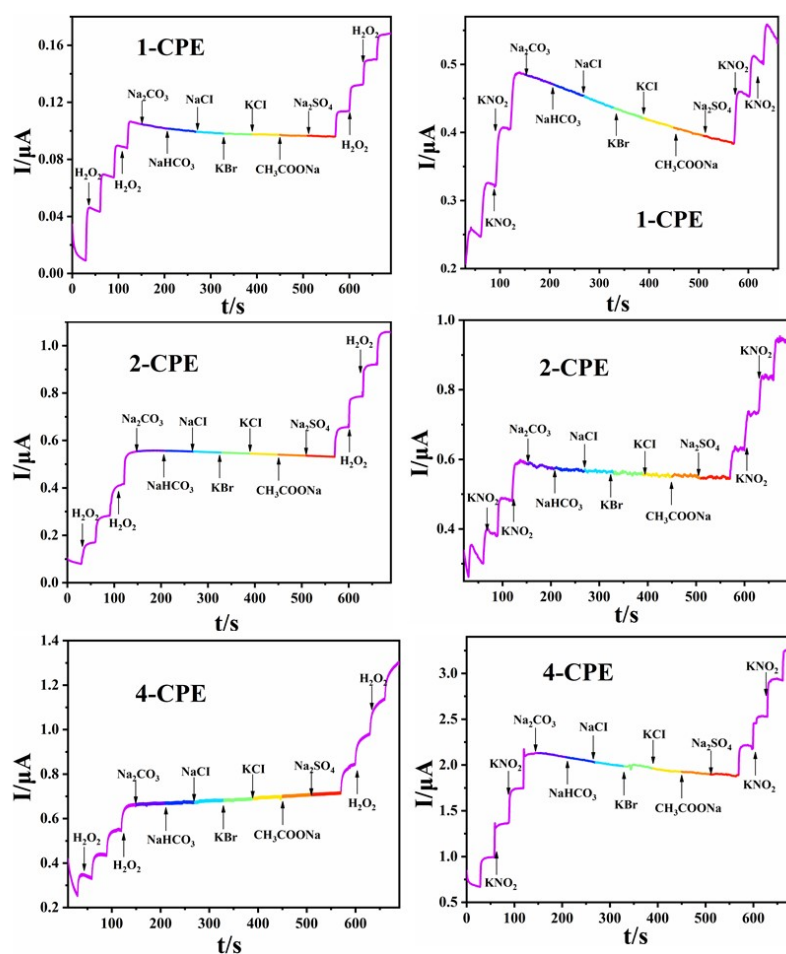

**Fig. S13.** Amperometric current responses of 1-, 2- and 4-CPEs to  $\text{NO}_2^-$  and  $\text{H}_2\text{O}_2$  in aqueous solution upon addition of various inorganic salts.



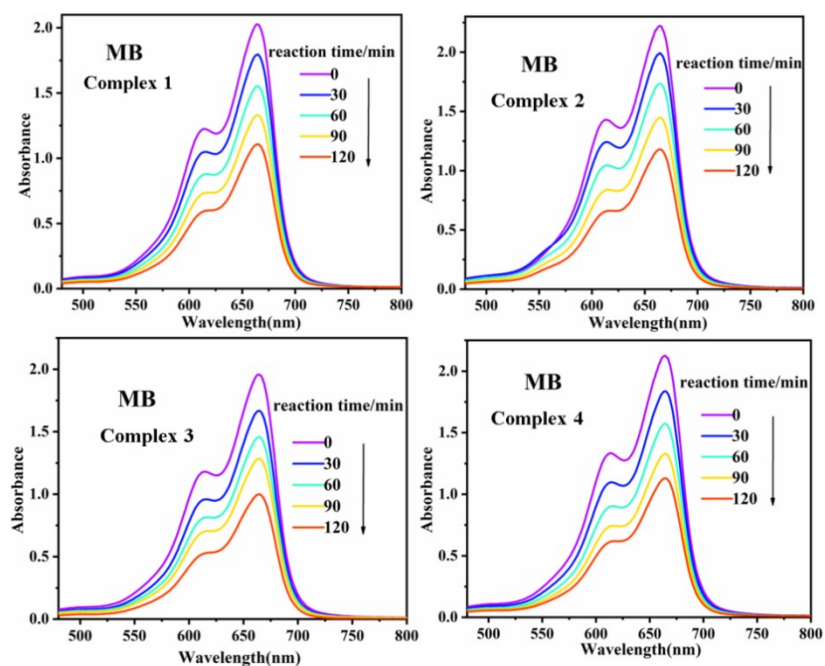

**Fig. S14.** The absorption spectra of MB solution during the decomposition reaction under UV irradiation with complexes **1–4** as catalysts.

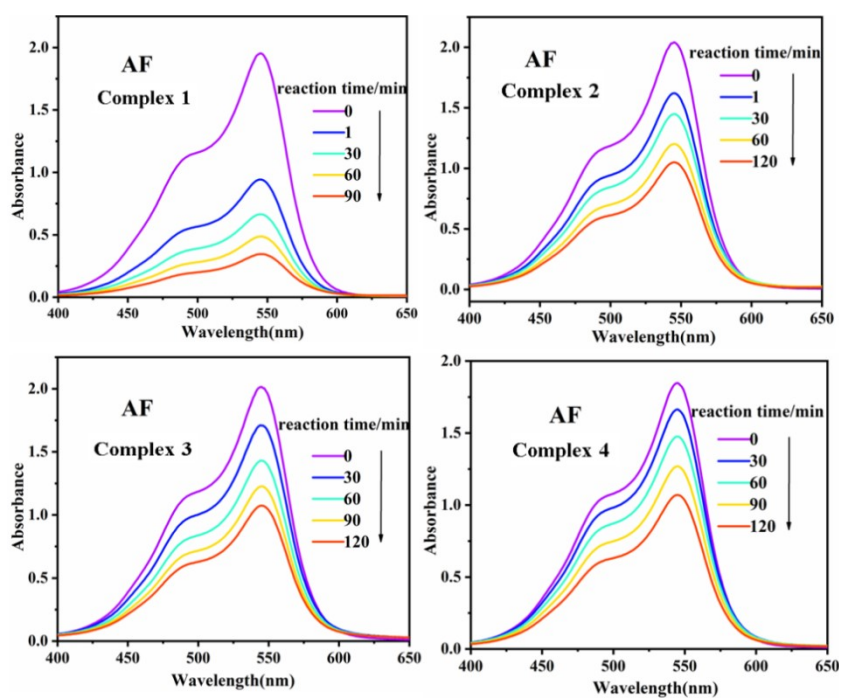

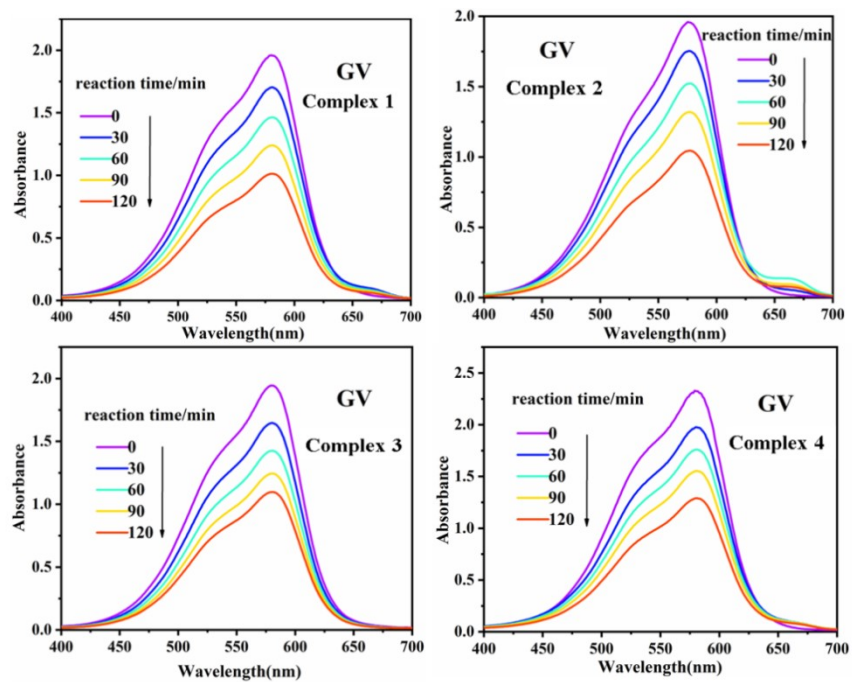

**Fig. S15.** The absorption spectra of GV and AF solution during the decomposition reaction under UV irradiation with complexes 1–4 as the catalysts.

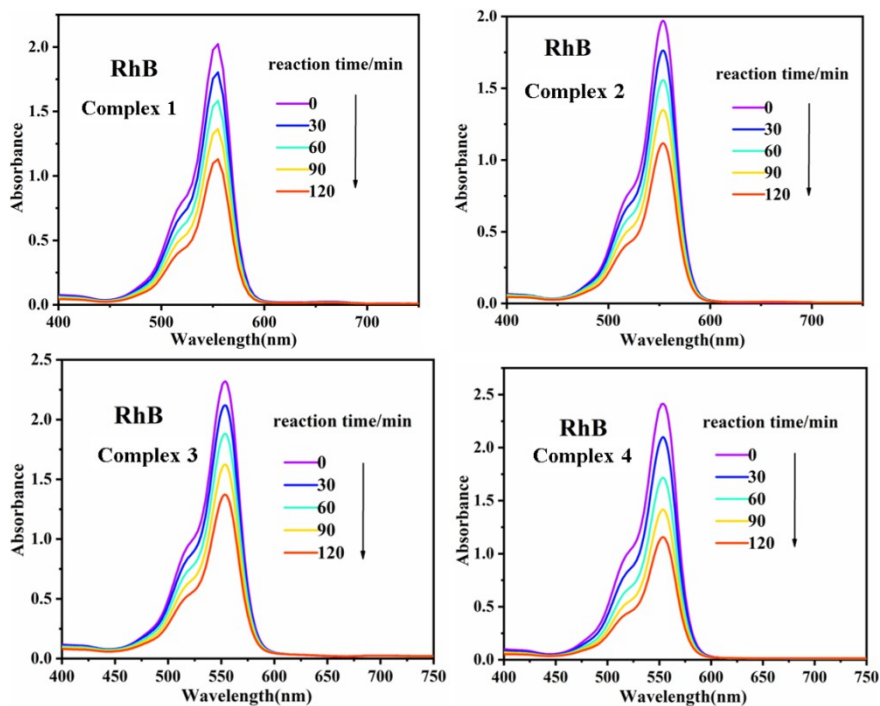

**Fig. S16.** Absorption spectra of the RhB solution during the decomposition reaction under UV irradiation with the complexes 1–4 as the catalyst.

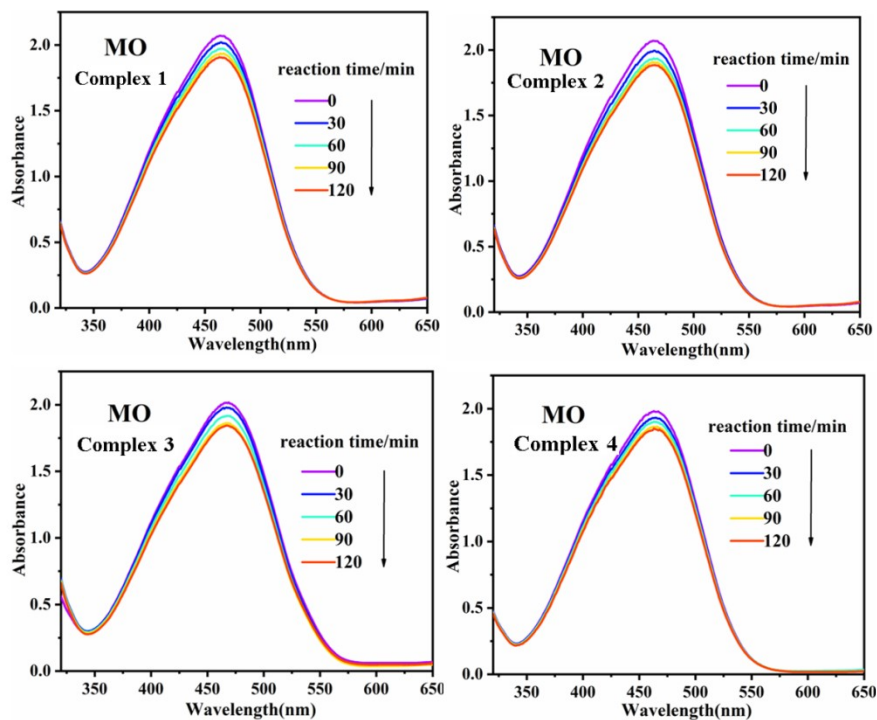

**Fig. S17.** Absorption spectra of the MO solution during the decomposition reaction under UV irradiation with the complexes 1–4 as the catalysts.

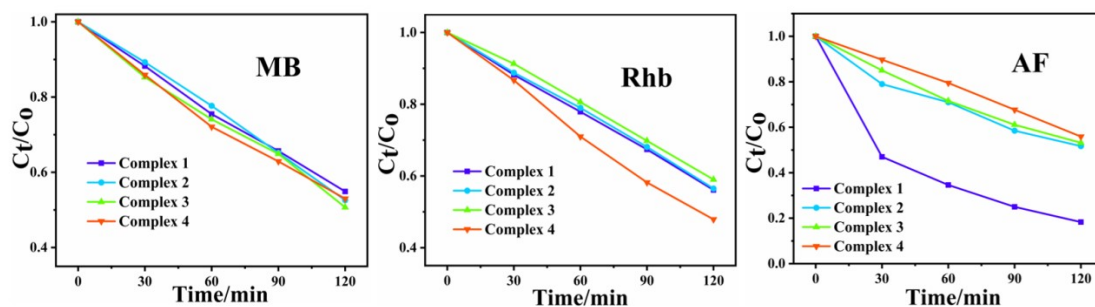

**Fig. S18.** The catalytic MB, RhB and AF conversion curves of complexes 1–4.

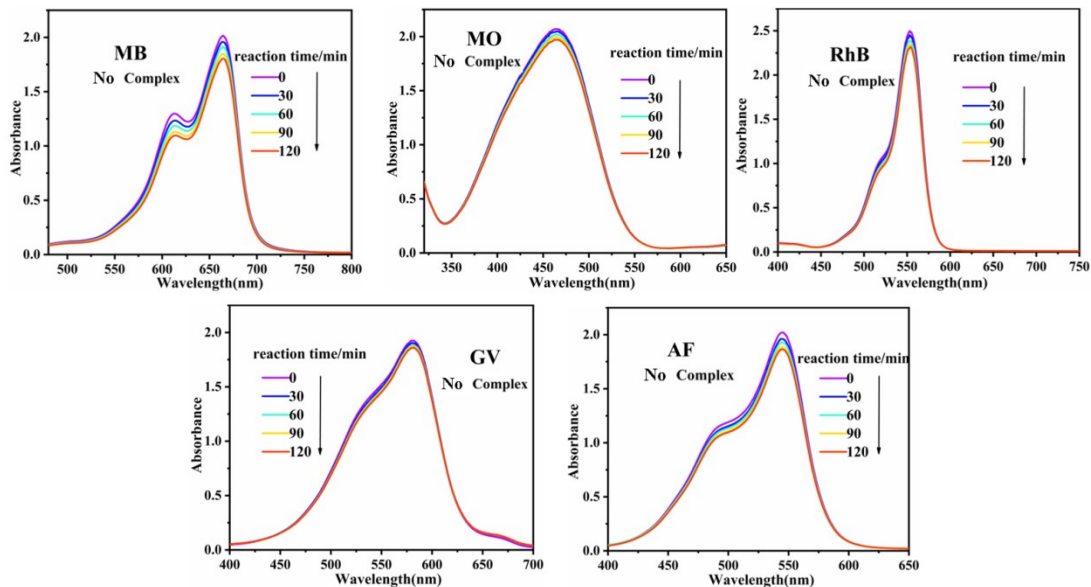

Fig. S19. Photocatalytic UV spectroscopy of organic dyes without catalysts.

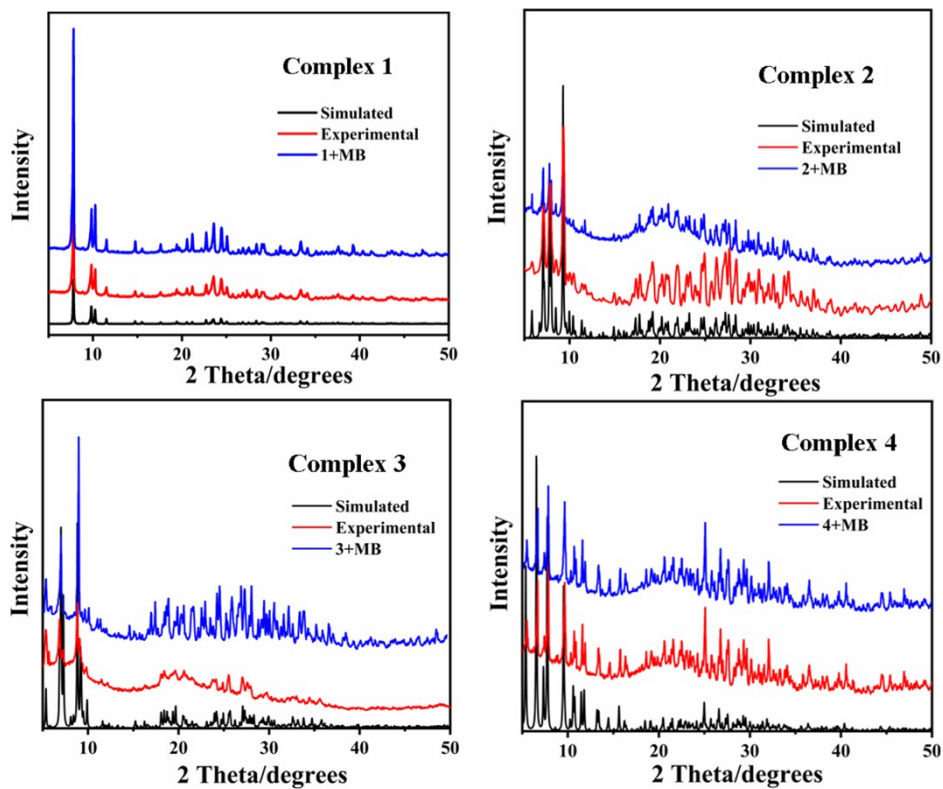

Fig. S20. The PXRD spectra of complexes 1-4.

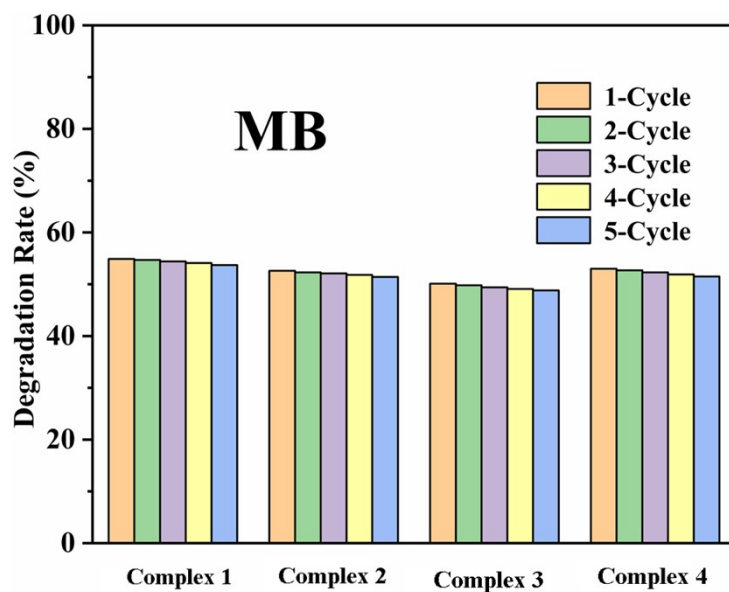

Fig. S21. Five cycles of photocatalytic degradation for MB of complexes 1–4.

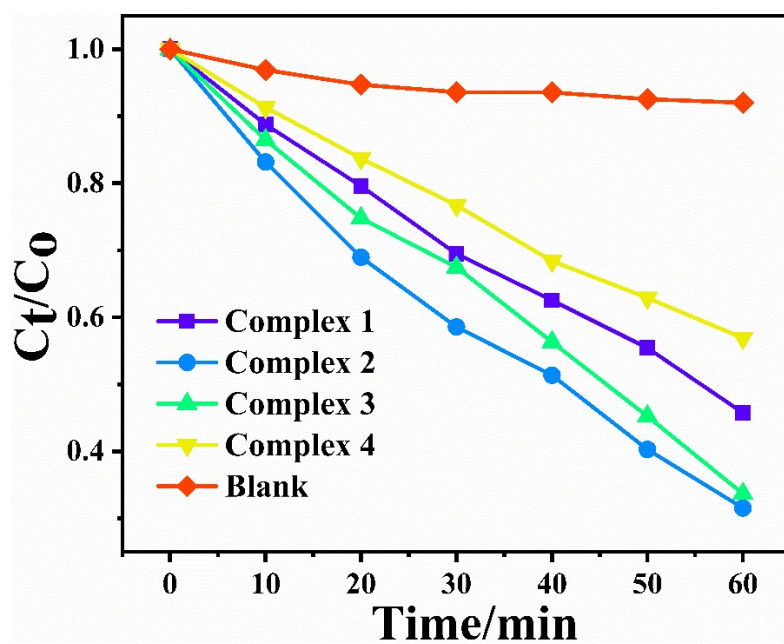

Fig. S22. Catalytic conversion curve of complexes 1–4.

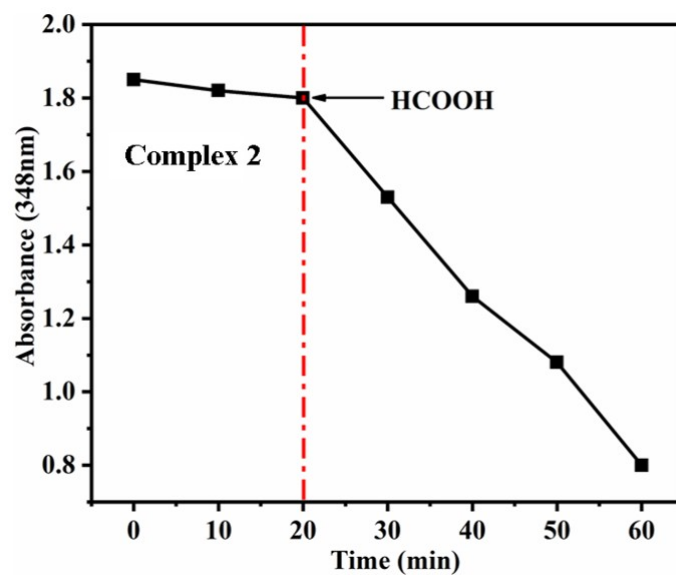

**Fig. S23.** Comparative experiment of complex 2 for catalytic reduction of Cr(VI): no formic acid was added in the first 20 minutes, and formic acid was added after 20 minutes.

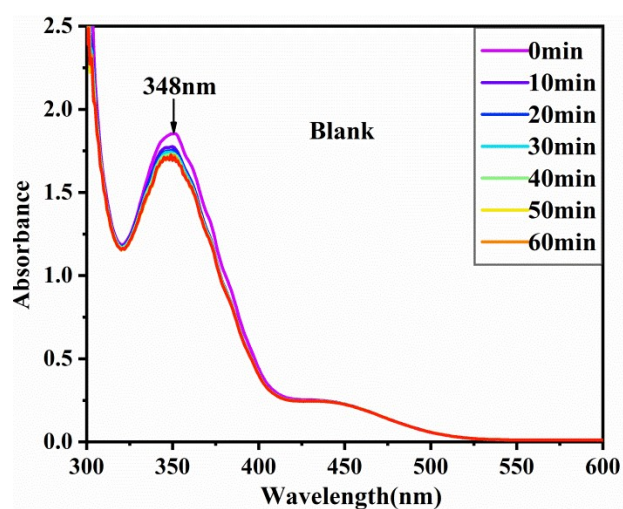

**Fig. S24.** UV spectra of complex 2 in Cr(VI) solution without xenon lamp irradiation.

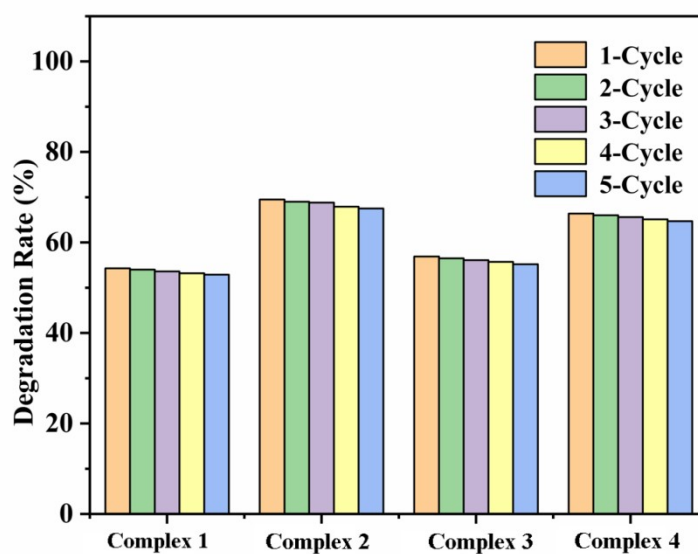

Fig. S25. Five cycles of photocatalytic reduction for Cr(VI) of complexes 1–4.

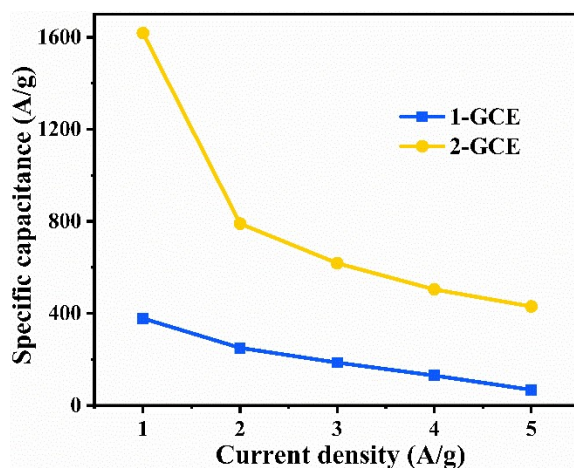

Fig. S26. The comparison of specific capacitance between 1–GCE and 2–GCE at different current densities.

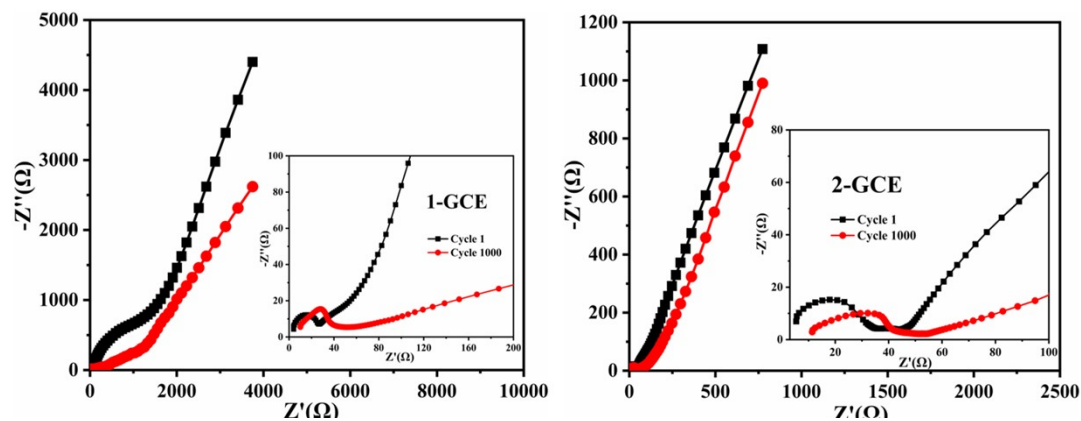

Fig. S27. Electrochemical impedance spectra of 1– and 2–GCE in 0.1 M H<sub>2</sub>SO<sub>4</sub> solution (inset: magnified part of the high frequency range of the electrochemical impedance).

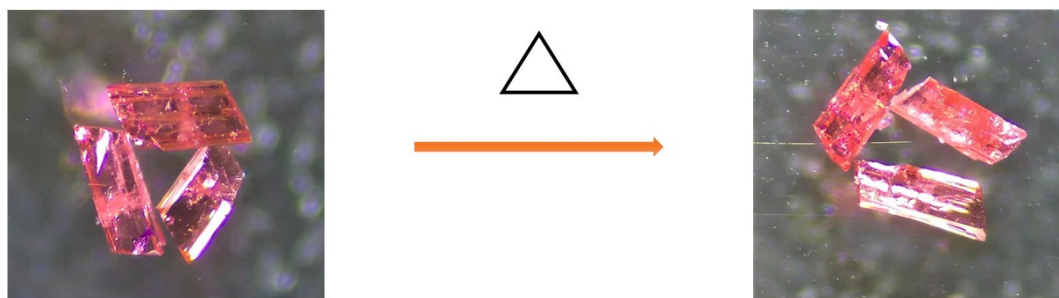

Fig. S28. Color change of complex 4 before and after thermochromism.

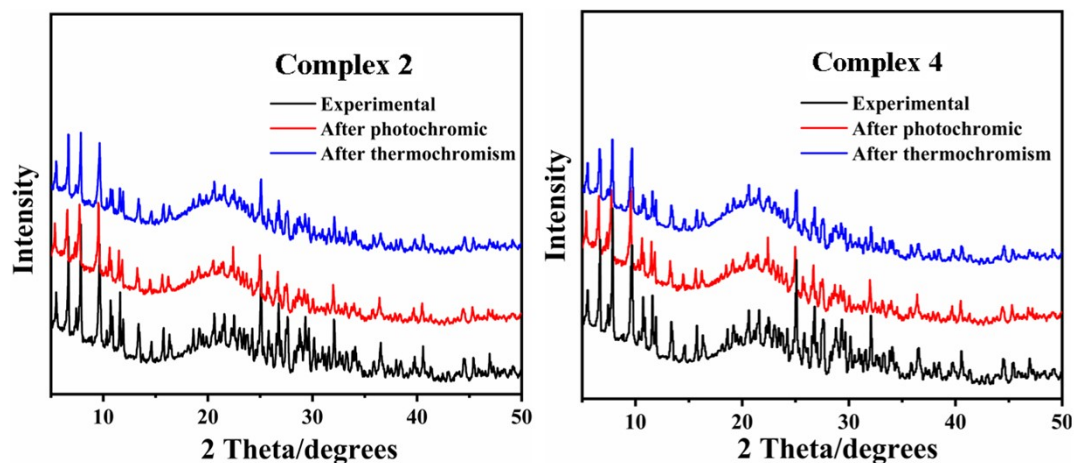

Fig. S29. PXRD before and after photochromism and thermochromism.

Table S2. Comparison of the specific capacitance values between complexes in this work and reported POMs-based electrode materials.

|   | Electrode material                                                                                                                                                                          | Electrolyte                                                                  | Scan rate/Current density | Specific capacitance    | Ref.             |
|---|---------------------------------------------------------------------------------------------------------------------------------------------------------------------------------------------|------------------------------------------------------------------------------|---------------------------|-------------------------|------------------|
| 1 | Complex 2                                                                                                                                                                                   | 0.1 M H <sub>2</sub> SO <sub>4</sub> + 0.5 M Na <sub>2</sub> SO <sub>4</sub> | 1 A g <sup>-1</sup>       | 1618 F g <sup>-1</sup>  | <b>This Work</b> |
| 2 | (PMo <sub>12</sub> /PANI/TiN NWA)                                                                                                                                                           | 1 M H <sub>2</sub> SO <sub>4</sub>                                           | 1 A g <sup>-1</sup>       | 469 F g <sup>-1</sup>   | 1                |
| 3 | [H(C <sub>10</sub> H <sub>10</sub> N <sub>2</sub> )Cu <sub>2</sub> ][PMo <sub>12</sub> O <sub>40</sub> ]                                                                                    | 0.5 M H <sub>2</sub> SO <sub>4</sub>                                         | 1 A g <sup>-1</sup>       | 287 F g <sup>-1</sup>   | 2                |
| 4 | [H(C <sub>10</sub> H <sub>10</sub> N <sub>2</sub> )Cu <sub>2</sub> ][PW <sub>12</sub> O <sub>40</sub> ]                                                                                     | 0.5 M H <sub>2</sub> SO <sub>4</sub>                                         | 1 A g <sup>-1</sup>       | 153.4 F g <sup>-1</sup> | 2                |
| 5 | [Cu <sub>1</sub> H <sub>2</sub> (C <sub>12</sub> H <sub>12</sub> N <sub>6</sub> )(PMo <sub>12</sub> O <sub>40</sub> )]·[(C <sub>6</sub> H <sub>15</sub> N)(H <sub>2</sub> O) <sub>2</sub> ] | 1 M H <sub>2</sub> SO <sub>4</sub>                                           | 3 A g <sup>-1</sup>       | 249 F g <sup>-1</sup>   | 3                |
| 6 | [Cu <sub>14</sub> H <sub>2</sub> (btX) <sub>5</sub> (PMo <sub>12</sub> O <sub>40</sub> ) <sub>2</sub> ]·2H <sub>2</sub> O                                                                   | 1 M H <sub>2</sub> SO <sub>4</sub>                                           | 2 A g <sup>-1</sup>       | 237.0 F g <sup>-1</sup> | 4                |
| 7 | [Cu <sub>14</sub> H <sub>2</sub> (btX) <sub>5</sub> (PW <sub>12</sub> O <sub>40</sub> ) <sub>2</sub> ]·2H <sub>2</sub> O                                                                    | 1 M H <sub>2</sub> SO <sub>4</sub>                                           | 2 A g <sup>-1</sup>       | 100.0 F g <sup>-1</sup> | 4                |
| 8 | RGO/PIL/PMo <sub>12</sub> O <sub>40</sub>                                                                                                                                                   | 0.5 M H <sub>2</sub> SO <sub>4</sub>                                         | 10 mV s <sup>-1</sup>     | 456 F g <sup>-1</sup>   | 5                |
| 9 | HT-RGO-PMo <sub>12</sub> O <sub>40</sub>                                                                                                                                                    | 1 M H <sub>2</sub> SO <sub>4</sub>                                           | 10 mV s <sup>-1</sup>     | 276 F g <sup>-1</sup>   | 6                |



|    |                                                                                                                                                                      |                                      |                     |                         |   |
|----|----------------------------------------------------------------------------------------------------------------------------------------------------------------------|--------------------------------------|---------------------|-------------------------|---|
| 10 | [Cu <sup>II</sup> <sub>2</sub> (bipy)(H <sub>2</sub> O) <sub>4</sub> (C <sub>6</sub> H <sub>5</sub> PO <sub>3</sub> ) <sub>2</sub> Mo <sub>5</sub> O <sub>15</sub> ] | 0.5 M H <sub>2</sub> SO <sub>4</sub> | 2 A g <sup>-1</sup> | 160.9 F g <sup>-1</sup> | 7 |
|----|----------------------------------------------------------------------------------------------------------------------------------------------------------------------|--------------------------------------|---------------------|-------------------------|---|

- (1) L. Lu, Y. Xie, *New J. Chem.*, 2017, **41**, 335-346. [DOI:10.1039/C6NJ02368A](https://doi.org/10.1039/C6NJ02368A)
- (2) S. Roy, V. Vemuri, S. Maiti, K. Manoj, *Inorg. Chem.*, 2018, **57**, 12078–12092. [DOI:10.1021/acs.inorgchem.8b01631](https://doi.org/10.1021/acs.inorgchem.8b01631)
- (3) D. Chai, J. Xin, B. Li, H. Pang, H. Ma, K. Li, B. Xiao, X. Wang and L. Tan, *Dalton Trans.*, 2019, **48**, 13026-13033. [DOI: 10.1039/C9DT02420D](https://doi.org/10.1039/C9DT02420D)
- (4) D. Chai, C. Gómez García, B. Li, H. Pang, H. Ma, X. Wang and L. Tan, *Chem Eng J*, 2019, **373**, 587-597. [DOI:10.1016/j.cej.2019.05.084](https://doi.org/10.1016/j.cej.2019.05.084)
- (5) M. Yang, B. Choi, S. Jung, Y. Han, Y. Huh and S. Lee, *Adv. Funct. Mater.*, 2014, **24**, 7301-7309. [DOI:10.1002/adfm.201401798](https://doi.org/10.1002/adfm.201401798)
- (6) J. Guevara, V. Ruiza, and P. Romero, *Phys. Chem. Chem. Phys.*, 2014, **16**, 20411-20414. [DOI:10.1039/C4CP03321C](https://doi.org/10.1039/C4CP03321C)
- (7) B. R. Lu, S. B. Li, J. Pan, L. Zhang, J. J. Xin, Y. Chen and X. G. Tan, *Inorg. Chem.*, 2020, **59**, 1702–1714. [DOI:10.1021/acs.inorgchem.9b02858](https://doi.org/10.1021/acs.inorgchem.9b02858)
